# Supplementary material
Source: MDPI journal article supplement (https://www.mdpi.com/2409-515X/10/1/20)
Supplement: s1 [file s1]

**Supplementary file 2:overview of genome positions that did not comply with quality requirements per method**

**tNGS**

| <b>Chr</b> | <b>Start</b> | <b>End</b> | <b>Gene</b> |
|------------|--------------|------------|-------------|
| 1          | 24135767     | 24135960   | HMGCL       |
| 1          | 24135964     | 24135964   | HMGCL       |
| 1          | 41445871     | 41445871   | CTPS1       |
| 1          | 41466475     | 41466494   | CTPS1       |
| 1          | 41466497     | 41466497   | CTPS1       |
| 1          | 45975488     | 45975488   | MMACHC      |
| 1          | 45975490     | 45975631   | MMACHC      |
| 1          | 45975740     | 45975741   | MMACHC      |
| 1          | 45977851     | 45978113   | MMACHC      |
| 1          | 53679365     | 53679529   | CPT2        |
| 1          | 64120651     | 64120690   | PGM1        |
| 1          | 64120693     | 64120695   | PGM1        |
| 1          | 76190049     | 76190123   | ACADM       |
| 1          | 76216469     | 76216470   | ACADM       |
| 1          | 76216546     | 76216586   | ACADM       |
| 1          | 76220608     | 76220634   | ACADM       |
| 1          | 76220722     | 76220784   | ACADM       |
| 1          | 76229263     | 76229374   | ACADM       |
| 1          | 100654908    | 100654908  | DBT         |
| 1          | 100657306    | 100657331  | DBT         |
| 1          | 100659255    | 100659257  | DBT         |
| 1          | 100659265    | 100659269  | DBT         |
| 1          | 100659273    | 100659320  | DBT         |
| 1          | 100659960    | 100660192  | DBT         |
| 1          | 100662091    | 100662092  | DBT         |
| 1          | 100665207    | 100665207  | DBT         |
| 1          | 100665209    | 100665395  | DBT         |
| 1          | 100665914    | 100666120  | DBT         |
| 1          | 100684836    | 100684842  | DBT         |
| 1          | 100684846    | 100684846  | DBT         |
| 1          | 100684849    | 100685049  | DBT         |
| 1          | 100685826    | 100685826  | DBT         |
| 1          | 120296000    | 120296019  | HMGCS2      |
| 2          | 26457949     | 26458109   | HADHA       |
| 2          | 26458112     | 26458112   | HADHA       |
| 2          | 27462862     | 27463038   | CAD         |
| 2          | 27463040     | 27463041   | CAD         |
| 2          | 71336804     | 71336837   | MCEE        |
| 2          | 71343893     | 71343897   | MCEE        |
| 2          | 211539006    | 211539136  | CPS1        |
| 2          | 211539207    | 211539208  | CPS1        |
| 2          | 228548610    | 228548612  | SLC19A3     |
| 2          | 228548621    | 228548621  | SLC19A3     |
| 2          | 228548624    | 228548714  | SLC19A3     |
| 2          | 228548719    | 228548719  | SLC19A3     |

|   |           |                   |
|---|-----------|-------------------|
| 2 | 228548723 | 228548723 SLC19A3 |
| 2 | 228549501 | 228549596 SLC19A3 |
| 2 | 228550644 | 228550828 SLC19A3 |
| 2 | 228550830 | 228550834 SLC19A3 |
| 2 | 228560801 | 228560801 SLC19A3 |
| 2 | 228566352 | 228566352 SLC19A3 |
| 2 | 228571305 | 228571317 SLC19A3 |
| 2 | 228571319 | 228571319 SLC19A3 |
| 2 | 228571331 | 228571370 SLC19A3 |
| 2 | 241819023 | 241819024 AGXT    |
| 2 | 241819030 | 241819143 AGXT    |
| 2 | 241819923 | 241819929 AGXT    |
| 3 | 15691945  | 15691946 BTD      |
| 3 | 15692380  | 15692492 BTD      |
| 3 | 15693693  | 15693693 BTD      |
| 3 | 15693696  | 15693707 BTD      |
| 3 | 15693709  | 15693709 BTD      |
| 3 | 15753330  | 15753385 BTD      |
| 3 | 15753388  | 15753392 BTD      |
| 3 | 15753396  | 15753397 BTD      |
| 3 | 135971230 | 135971241 PCCB    |
| 3 | 135978982 | 135979019 PCCB    |
| 3 | 135979022 | 135979023 PCCB    |
| 3 | 136053694 | 136053983 PCCB    |
| 3 | 136055803 | 136055806 PCCB    |
| 3 | 164696676 | 164696803 SI      |
| 3 | 164714561 | 164714570 SI      |
| 3 | 164751174 | 164751174 SI      |
| 3 | 170727737 | 170727755 SLC2A2  |
| 3 | 182833424 | 182833599 MCCC1   |
| 4 | 993598    | 993598 IDUA       |
| 4 | 993603    | 993624 IDUA       |
| 4 | 996955    | 997070 IDUA       |
| 4 | 17488508  | 17488508 QDPR     |
| 4 | 17513758  | 17513758 QDPR     |
| 4 | 159601032 | 159601263 ETFDH   |
| 4 | 159630172 | 159630193 ETFDH   |
| 4 | 159630196 | 159630196 ETFDH   |
| 4 | 159630198 | 159630198 ETFDH   |
| 4 | 159630201 | 159630202 ETFDH   |
| 4 | 159630206 | 159630206 ETFDH   |
| 4 | 159630425 | 159630428 ETFDH   |
| 4 | 159630432 | 159630630 ETFDH   |
| 5 | 41739828  | 41739833 OXCT1    |
| 5 | 70932287  | 70932548 MCCC2    |
| 5 | 70953392  | 70953392 MCCC2    |
| 5 | 70953456  | 70953505 MCCC2    |
| 5 | 125878955 | 125878955 ALDH7A1 |
| 5 | 125900040 | 125900056 ALDH7A1 |
| 5 | 125907052 | 125907054 ALDH7A1 |

|    |           |                   |
|----|-----------|-------------------|
| 5  | 125929033 | 125929041 ALDH7A1 |
| 5  | 131713420 | 131713421 SLC22A5 |
| 5  | 131715273 | 131715392 SLC22A5 |
| 5  | 131730053 | 131730053 SLC22A5 |
| 6  | 81053717  | 81053719 BCKDHB   |
| 6  | 81053784  | 81054305 BCKDHB   |
| 6  | 81055961  | 81055962 BCKDHB   |
| 6  | 81055966  | 81055972 BCKDHB   |
| 6  | 81055979  | 81055997 BCKDHB   |
| 7  | 44182802  | 44182820 GCK      |
| 7  | 44187412  | 44187442 GCK      |
| 7  | 137783050 | 137783066 AKR1D1  |
| 7  | 137802498 | 137802706 AKR1D1  |
| 7  | 144316264 | 144316275 TPK1    |
| 7  | 144316282 | 144316300 TPK1    |
| 8  | 63961102  | 63961159 TTPA     |
| 8  | 63972316  | 63972332 TTPA     |
| 8  | 63972336  | 63972344 TTPA     |
| 8  | 63972373  | 63972374 TTPA     |
| 8  | 63972377  | 63972384 TTPA     |
| 8  | 63972398  | 63972455 TTPA     |
| 8  | 63973233  | 63973235 TTPA     |
| 8  | 63978659  | 63978659 TTPA     |
| 8  | 144297961 | 144298018 GPIHBP1 |
| 9  | 35741307  | 35741502 GBA2     |
| 9  | 35749100  | 35749101 GBA2     |
| 9  | 35749132  | 35749146 GBA2     |
| 9  | 35749151  | 35749155 GBA2     |
| 9  | 35749202  | 35749235 GBA2     |
| 9  | 97365415  | 97365415 FBP1     |
| 9  | 97401801  | 97401810 FBP1     |
| 9  | 104147127 | 104147298 BAAT    |
| 9  | 133320084 | 133320189 ASS1    |
| 9  | 133320195 | 133320198 ASS1    |
| 9  | 133320205 | 133320207 ASS1    |
| 9  | 133320244 | 133320284 ASS1    |
| 9  | 133376649 | 133376671 ASS1    |
| 10 | 69587290  | 69587395 DNAJC12  |
| 10 | 69587397  | 69587397 DNAJC12  |
| 10 | 69587429  | 69587447 DNAJC12  |
| 10 | 88835782  | 88835790 GLUD1    |
| 10 | 126100238 | 126100240 OAT     |
| 10 | 126103628 | 126103651 OAT     |
| 11 | 2189922   | 2189966 TH        |
| 11 | 2191995   | 2192010 TH        |
| 11 | 68522950  | 68523502 CPT1A    |
| 11 | 68586145  | 68586170 CPT1A    |
| 11 | 68609233  | 68609298 CPT1A    |
| 11 | 68609306  | 68609309 CPT1A    |
| 11 | 68609368  | 68609409 CPT1A    |

|    |           |                   |
|----|-----------|-------------------|
| 11 | 107999758 | 107999938 ACAT1   |
| 11 | 108005143 | 108005185 ACAT1   |
| 11 | 112140594 | 112140594 PTS     |
| 11 | 118898436 | 118898436 SLC37A4 |
| 13 | 41363538  | 41363637 SLC25A15 |
| 13 | 41363731  | 41363734 SLC25A15 |
| 13 | 41363736  | 41363809 SLC25A15 |
| 13 | 41384345  | 41384504 SLC25A15 |
| 13 | 41385306  | 41385537 SLC25A15 |
| 13 | 100813228 | 100813229 PCCA    |
| 15 | 40711511  | 40712283 IVD      |
| 15 | 40712349  | 40712349 IVD      |
| 15 | 40713491  | 40713491 IVD      |
| 15 | 45665424  | 45665539 GATM     |
| 15 | 45670725  | 45670737 GATM     |
| 15 | 45670742  | 45670742 GATM     |
| 15 | 45670746  | 45670746 GATM     |
| 15 | 45670748  | 45670753 GATM     |
| 15 | 76518681  | 76518686 ETFA     |
| 15 | 76522835  | 76523000 ETFA     |
| 15 | 76576696  | 76576811 ETFA     |
| 15 | 76577136  | 76577278 ETFA     |
| 15 | 76602358  | 76602358 ETFA     |
| 15 | 76602360  | 76602415 ETFA     |
| 15 | 80444822  | 80444897 FAH      |
| 15 | 80445112  | 80445291 FAH      |
| 15 | 80445294  | 80445297 FAH      |
| 15 | 80448283  | 80448425 FAH      |
| 15 | 80448429  | 80448432 FAH      |
| 16 | 30999652  | 30999653 HSD3B7   |
| 16 | 30999660  | 30999939 HSD3B7   |
| 16 | 71601098  | 71601257 TAT      |
| 16 | 71611002  | 71611003 TAT      |
| 17 | 3564838   | 3564838 CTNS      |
| 17 | 3565388   | 3565535 CTNS      |
| 17 | 3565606   | 3565606 CTNS      |
| 17 | 7121025   | 7121027 ACADVL    |
| 17 | 7127900   | 7127900 ACADVL    |
| 17 | 7127905   | 7127966 ACADVL    |
| 17 | 26727722  | 26727722 SLC46A1  |
| 17 | 41064988  | 41064995 G6PC     |
| 17 | 73747665  | 73747748 GALK1    |
| 17 | 73759039  | 73759039 GALK1    |
| 19 | 1398155   | 1398594 GAMT      |
| 19 | 1401564   | 1401579 GAMT      |
| 19 | 13003070  | 13003107 GCDH     |
| 19 | 13003121  | 13003258 GCDH     |
| 19 | 40736733  | 40736906 AKT2     |
| 19 | 40743339  | 40743473 AKT2     |
| 19 | 40748831  | 40749009 AKT2     |

|    |           |                 |
|----|-----------|-----------------|
| 19 | 40749692  | 40749933 AKT2   |
| 19 | 40749964  | 40749966 AKT2   |
| 19 | 40774718  | 40775002 AKT2   |
| 19 | 40790946  | 40791009 AKT2   |
| 19 | 40791078  | 40791312 AKT2   |
| 19 | 41903574  | 41903574 BCKDHA |
| 19 | 41924620  | 41924669 BCKDHA |
| 19 | 45409607  | 45409614 APOE   |
| 19 | 45410124  | 45410360 APOE   |
| 19 | 45411199  | 45411219 APOE   |
| 19 | 45411780  | 45411783 APOE   |
| 19 | 45452269  | 45452269 APOC2  |
| 19 | 45452271  | 45452320 APOC2  |
| 19 | 45452327  | 45452329 APOC2  |
| 19 | 45452334  | 45452336 APOC2  |
| 19 | 51849086  | 51849189 ETFB   |
| 19 | 51851481  | 51851482 ETFB   |
| 19 | 51851489  | 51851505 ETFB   |
| 19 | 51851550  | 51851558 ETFB   |
| 19 | 51851563  | 51851642 ETFB   |
| 19 | 51858400  | 51859327 ETFB   |
| 19 | 51869595  | 51869682 ETFB   |
| 20 | 746424    | 746432 SLC52A3  |
| 20 | 746741    | 746742 SLC52A3  |
| 20 | 746764    | 746768 SLC52A3  |
| 20 | 746772    | 746798 SLC52A3  |
| 20 | 32889903  | 32890008 AHCY   |
| 20 | 32890011  | 32890013 AHCY   |
| 20 | 32890015  | 32890015 AHCY   |
| 20 | 32890017  | 32890018 AHCY   |
| 20 | 32890020  | 32890023 AHCY   |
| 20 | 43280384  | 43280409 ADA    |
| 21 | 38121747  | 38121747 HLCS   |
| 21 | 38302544  | 38302544 HLCS   |
| 21 | 38320323  | 38320597 HLCS   |
| 21 | 38338734  | 38338979 HLCS   |
| 21 | 44495977  | 44496065 CBS    |
| 21 | 44496475  | 44496488 CBS    |
| 21 | 44496491  | 44496512 CBS    |
| 22 | 51062090  | 51062394 ARSA   |
| 22 | 51062562  | 51062562 ARSA   |
| 22 | 51062565  | 51062753 ARSA   |
| 22 | 51063152  | 51063170 ARSA   |
| 22 | 51066570  | 51066617 ARSA   |
| X  | 152991611 | 152991631 ABCD1 |

#### WES

| Gene | Genomic location (GRCh37)    | GENCODE transcript  | Exon location in transcript  |
|------|------------------------------|---------------------|------------------------------|
| ARG1 | Chr6:131,868,263-131,868,338 | ENST00000672233.1_1 | Exon 2 (from start) out of 8 |
| BTB  | Chr3:15,709,536-15,709,748   | ENST00000673467.1_3 | Exon 4 (till stop) out of 4  |

|         |                              |                     |                               |
|---------|------------------------------|---------------------|-------------------------------|
| BTD     | Chr3:15,713,117-15,713,140   | ENST00000673620.1_5 | Exon 4 (till stop) out of 4   |
| BTD     | Chr3:15,751,567-15,751,581   | ENST00000672141.1_5 | Exon 4 (till stop) out of 4   |
| BTD     | Chr3:15,751,906-15,751,932   | ENST00000672760.1_3 | Exon 4 (till stop) out of 4   |
| BTD     | Chr3:15,763,277-15,763,356   | ENST00000672427.1_4 | Exon 5 (till stop) out of 5   |
| CA5A    | Chr16:87,915,417-87,915,545  | ENST00000649158.1_3 | Exon 7 (till stop) out of 7   |
| CTPS1   | Chr1:41,469,653-41,469,786   | ENST00000463285.7_3 | Exon 13 (till stop) out of 13 |
| FBP1    | Chr9:97,400,625-97,400,692   | ENST00000648117.1_3 | Exon 1 (from start) out of 6  |
| MMADHC  | Chr2:150,428,744-150,428,845 | ENST00000422782.2_3 | Exon 7 out of 9               |
| PGM1    | Chr1:64,120,661-64,120,782   | ENST00000650546.1_1 | Exon 11 out of 12             |
| SLC19A3 | Chr2:228,550,866-228,550,885 | ENST00000409287.5_3 | Exon 4 (till stop) out of 4   |

## WGS

Two genes with low coverage in males

ABCD1 chrX: 152,990,323-153,010,216 forward strand

OTC chrX: 38,211,798-38,280,703 forward strand

One gene with low coverage overall in both sexes (due to pseudogene)

CBS chr21: 44,473,301-44,497,053 reverse strand
