# Supplementary material
Source: MDPI journal article supplement (https://www.mdpi.com/2409-515X/10/1/20)
Supplement: s1 [file s1]

## **Future of Dutch NGS-based newborn screening: exploring the technical possibilities and assessment of a variant classification strategy**

**Authors:** Gea Kiewiet<sup>1\*</sup>, Dineke Westra<sup>2\*</sup>, Eddy N. de Boer<sup>1\*</sup>, Emma van Berkel<sup>2</sup>, Tom.G.J. Hofste<sup>2</sup>, Martine van Zweeden<sup>2</sup>, Ronny C. Derks<sup>2</sup>, Nico F.A. Leijsten<sup>2</sup>, Martina H.A. Ruiterkamp-Versteeg<sup>2</sup>, Bart Charbon<sup>1</sup>, Lennart Johansson<sup>1</sup>, Janneke Bos-Kruizinga<sup>1</sup>, Inge J. Veenstra<sup>1</sup>, Monique G.M. de Sain-van der Velden<sup>3</sup>, Els Voorhoeve<sup>4</sup>, M. Rebecca Heiner-Fokkema<sup>5</sup>, Francjan van Spronsen<sup>6</sup>, Birgit Sikkema-Raddatz<sup>1\*\*</sup>, Marcel Nelen<sup>2,7\*\*</sup>

### **Institutional affiliations:**

<sup>1</sup>Department of Genetics, University Medical Center Groningen, University of Groningen, Groningen, Netherlands

<sup>2</sup>Department of Human Genetics, Radboud university medical center, Nijmegen, The Netherlands

<sup>3</sup>Section Metabolic Diagnostics, Department of Genetics, University Medical Center Utrecht, The Netherlands

<sup>4</sup>Center for Health Protection, National Institute for Public Health and the Environment, Bilthoven, The Netherlands

<sup>5</sup>Laboratory of Metabolic Diseases, Department of Laboratory Medicine, University Medical Center Groningen, University of Groningen, Groningen, The Netherlands

<sup>6</sup>Division of Metabolic Diseases, Beatrix Children's Hospital, University Medical Center Groningen, University of Groningen, Groningen, Netherlands

<sup>7</sup>Department of Genetics, University Medical Center Utrecht, Utrecht, The Netherlands.

*\* Contributed equally as co-first authors*

*\*\* Contributed equally as co-senior authors*

## **METHODS**

### **Dried blood spots and DNA extraction**

Fifty dried blood spots (DBS) from patients with an inherited metabolic disorder (IMD) associated with one of the selected 100 genes contained either capillary blood or Li-heparine anticoagulated blood. For the control samples, 75–80 µL of EDTA-anticoagulated blood were drawn on two half-inch (13 mm) circles of a DBS-card (Eastern Business Forms, Mauldin, SC, USA) and air dried for at least 3 hours at room temperature. DNA was extracted in two runs using half a blood spot for each DNA extraction. Punches were taken using a 6 mm manual puncher. The punches were washed with milliQ, after which TE buffer and proteinase K were added and lysis was done at 56°C for 2 hours. Next, automated DNA isolation was

performed on a Nimbus Presto robot (Hamilton, Manchester, ME, USA) using the Mag-Bind® Blood & Tissue DNA HDQ kit following the manufacturer's instructions (Omega Biotek, Norcross, GA, USA). Extracted DNA was quantified using a dropsense96 UV/Vis spectrophotometer (TRINEAN NV/SA, Gentbrugge, Belgium). For the healthy individual cohort, DNA was isolated from EDTA whole blood samples on a chemagicSTAR (Hamilton Robotics, Reno, NV, USA).

### **Design of the targeted panel**

A custom Sureselect capture panel was designed using the web-based design program SureDesign (Agilent, Santa Clara, California, USA). The panel includes all coding and non-coding exons and UTRs of the genes of interest (Table E1), as present in the RefSeq and Ensemble databases, together with some specific intronic regions that were considered clinically relevant. Probes were designed based on the GRCh37/hg19 build of the human genome, with 2x tiling frequency and boosted for optimized performance. By employing less stringent specificity settings for the remaining gaps in previous design rounds, multiple probe groups were eventually generated and merged to create a final design with maximum coverage. The performance of the panel was confirmed in a standard experiment on a set of reference DNA samples before its use in experiments with DBS samples.

### **Preparation of samples and sequencing targeted panel**

For tNGS, libraries were automatically prepared following the SureSelect XT low input target enrichment system protocol on the Bravo NGS workstation (Agilent Technologies, Santa Clara, CA, USA). We used 100 ng DNA as input material. The intermediate products and library were qualified and quantified using a tapestation 2200 bioanalyzer (D1000 screentapes and reagents) (Agilent Technologies, Santa Clara, CA, USA). When library preparation failed, the procedure was repeated once for each sample, if enough DNA was available. The sequence procedure was executed on a NextSeq500 sequencer (Illumina, San Diego, USA). Read alignment and single nucleotide variant (SNV) and indel calling was performed using the MOLGENIS NGS\_DNA pipeline version 3.6.0 ([https://github.com/molgenis/NGS\\_DNA](https://github.com/molgenis/NGS_DNA)), using the Burrows-Wheeler Aligner (BWA) for alignment [1] against human reference genome build b37 as released by the 1000 Genomes Project [2]. The Genome Analysis Toolkit [3], version 3.7, was used for SNV and indel calling, annotation and coverage calculations. To call copy number variations (CNVs), we used CoNVaDING 1.2.1 [4] with the default settings. To create the control group, a preliminary run was performed including all DBS samples as control group. For the final analysis, samples having one or more calls on the shortlist were excluded as control. Using this control group, all DBS samples were examined for CNVs using the reduced control

group. CNVs on the final list were regarded as a CNV call. For data analysis, vcf files were uploaded into the Alissa clinical informatics platform (Agilent technologies). Analysis of sequence variants in the 100 selected genes (SNVs and small indels) was performed using Alissa Interpret software (Agilent Technologies).

### **Preparation of samples and sequencing WES**

WES was performed similarly to previous reports, with some modifications [5]. In brief, DBS DNA samples were processed using the Human Core Exome Kit and extended RefSeq targets (Twist Biosciences, South San Francisco, CA, USA); for the background cohort, the exome was captured with the Agilent SureSelect v4/v5 kit (Agilent Technologies, Santa Clara, CA, USA). Libraries were prepared according to the manufacturers' protocols. All DNA samples were sheared using a Covaris R230 ultrasonicator (Covaris, Woburn, MA, USA), equimolar pooled (anticipating 100-fold coverage) and sequenced using 2 × 150bp paired-end sequencing on a HiSeq or Novaseq 6000 instrument (Illumina, San Diego, CA, USA). Downstream processing was performed using an automated data analysis pipeline that includes BWA mapping (human reference genome (GRCh37/hg19)), Genome Analysis Toolkit (GATK) calling for Single Nucleotide Variants (SNVs), CoNIFER and ExomeDepth calling for Copy Number Variants (CNVs) for bloodspot DNA, and custom-made annotation [6]. An in-silico gene-panel analysis was conducted encompassing the list of 100 established genes (Table E1).

### **Preparation of samples and sequencing WGS**

WGS was performed as described by the manufacturer (Illumina, San Diego, CA, USA). In brief, 100 ng DNA was used for manual library preparation using the Illumina DNA PCR-free library prep protocol. Insert size was set at an average of 450 bp by shearing DNA using a Covaris R230 ultrasonicator (Covaris, Woburn, MA, USA). Samples were equimolarly pooled followed by 2 × 150 bp paired-end sequencing using two Illumina S4 flowcells (kindly provided by Illumina) on a NovaSeq6000™ instrument, anticipating a genome-wide coverage of 30-fold. FASTQ files were processed through our in-house developed GS-pipeline. Reads were mapped to the human reference genome (GRCh38/hg38) using BWA (v.0.78). Variant calling was performed per variant type using dedicated tools to optimize sensitivity, followed by variant annotation to facilitate variant interpretation. Similar in-silico gene-panel analysis was conducted encompassing the list of 100 established genes (Table E1).

### **Definitions of TP/TN/FP/FN in the (L)P filter strategy**

In the strict filtering strategy reporting only pathogenic (P) and likely pathogenic (LP) variants, a sample was regarded **true positive (TP)** if one P or LP variant was detected with a variant

allele frequency (VAF) of 40-60% in an autosomal dominant (AD) gene or with a VAF of >90% in an autosomal recessive (AR) gene or X-linked recessive (XL) gene, or if two LP or P variants were detected with a VAF of 40-60% in an AR gene in an IMD-positive sample. A **false positive (FP)** was when these possibilities were detected in a control sample or in a gene other than the known affected gene in an IMD-positive sample. In the BC, all individual with a (L)P variant are considered FP, as we assume they will not have one of the target diseases. A sample was regarded **false negative (FN)** when the known (LP or P) variant was not detected in the AD or XL gene or the two known LP or P variants were not detected in the AR gene in an IMD-positive sample. **True negative (TN)** samples were control samples in which no LP or P variant detected with a VAF of 40-60% in an AD or with a VAF of >90% in an AR or XL gene or in which two LP or P variants were detected with a VAF of 40-60% in an AR gene.

**Table S1: Genes and associated disorders included in gene panel**

| Gene           | Genomic location (GRCh37)                    | Disorder                                                                                                      | OMIM disease # | Mode of inheritance | Disease in Dutch NBS? |
|----------------|----------------------------------------------|---------------------------------------------------------------------------------------------------------------|----------------|---------------------|-----------------------|
| <i>ABCD1</i>   | chrX:152,990,323-153,010,216 forward strand  | X-linked adrenoleukodystrophy                                                                                 | 300100         | XLR                 | No                    |
| <i>ACADM</i>   | chr1:76,190,036-76,253,260 forward strand    | Medium-chain acyl-CoA dehydrogenase deficiency                                                                | 201450         | AR                  | Yes                   |
| <i>ACADVL</i>  | chr17:7,120,444-7,128,592 forward strand     | Very long-chain acyl-CoA dehydrogenase deficiency                                                             | 201475         | AR                  | Yes                   |
| <i>ACAT1</i>   | chr11:107,992,243-108,018,503 forward strand | Mitochondrial acetoacetyl-CoA thiolase deficiency                                                             | 203750         | AR                  | No                    |
| <i>ADA</i>     | chr20:43,248,163-43,280,874 reverse strand   | Severe combined immunodeficiency (due to adenosine deaminase deficiency)                                      | 102700         | AR                  | Yes                   |
| <i>AGL</i>     | chr1:100,315,640-100,389,579 forward strand  | Glycogen storage disease type 3 (due to glycogen debranching enzyme deficiency)                               | 232400         | AR                  | No                    |
| <i>AGXT</i>    | chr2:241,807,896-241,819,919 forward strand  | Primary hyperoxaluria type 1 (due to alanine-glyoxylate aminotransferase deficiency)                          | 259900         | AR                  | No                    |
| <i>AHCY</i>    | chr20:32,868,074-32,899,608 reverse strand   | S-adenosylhomocysteine hydrolase deficiency                                                                   | 613752         | AR                  | No                    |
| <i>AKR1D1</i>  | chr7:137,687,070-137,802,732 forward strand  | Congenital bile acid synthesis defect type 2 (due to $\Delta$ 4-3-oxosteroid 5 $\beta$ -reductase deficiency) | 235555         | AR                  | No                    |
| <i>AKT2</i>    | chr19:40,736,224-40,791,443 reverse strand   | Hypoinsulinemic hypoglycemia with hemihypertrophy (due to AKT2 superactivity)                                 | 240900         | AD                  | No                    |
| <i>ALDH7A1</i> | chr5:125,877,533-125,931,110 reverse strand  | Pyridoxine-dependent epilepsy (due to $\alpha$ -aminoadipic semialdehyde dehydrogenase deficiency)            | 266100         | AR                  | No                    |
| <i>ALDOB</i>   | chr9:104,182,860-104,198,105 reverse strand  | Hereditary fructose intolerance (due to aldolase B deficiency)                                                | 229600         | AR                  | No                    |
| <i>AMN</i>     | chr14:103,388,993-103,399,933 forward strand | Imerslund-Gräsbeck syndrome, Norwegian type (due to amnionless deficiency)                                    | 618882         | AR                  | No                    |
| <i>APOC2</i>   | chr19:45,449,243-45,452,822 forward strand   | Familial apolipoprotein C2 deficiency                                                                         | 207750         | AR                  | No                    |
| <i>APOE</i>    | chr19:45,409,011-45,412,650 forward strand   | Dysbetalipoproteinemia / Hyperlipoproteinemia type 3 (due to apolipoprotein E deficiency)                     | 617347         | AR                  | No                    |
| <i>ARG1</i>    | chr6:131,894,284-131,905,472 forward strand  | Argininemia (due to arginase deficiency)                                                                      | 207800         | AR                  | No                    |
| <i>ARSA</i>    | chr22:51,061,182-51,066,607 reverse strand   | Metachromatic leukodystrophy (due to arylsulfatase A deficiency)                                              | 250100         | AR                  | No                    |
| <i>ASL</i>     | chr7:65,540,785-65,558,545 forward strand    | Argininosuccinic aciduria (due to argininosuccinate lyase deficiency)                                         | 207900         | AR                  | No                    |
| <i>ASS1</i>    | chr9:133,320,316-133,376,661 forward strand  | Citrullinemia type 1 (due to argininosuccinate synthetase deficiency)                                         | 215700         | AR                  | No                    |
| <i>ATP7B</i>   | chr13:52,506,809-52,585,630 reverse strand   | Wilson disease (due to copper-transporting ATPase $\beta$ subunit deficiency)                                 | 277900         | AR                  | No                    |
| <i>BAAT</i>    | chr 9:104,122,699-104,145,801 reverse strand | Bile acid conjugation defect 1 (due to bile acid-CoA:amino acid N-acyltransferase deficiency)                 | 619232         | AR                  | No                    |
| <i>BCKDHA</i>  | chr19:41,884,215-41,930,910 forward strand   | Maple syrup urine disease type 1a (due to branched-chain ketoacid dehydrogenase E1 $\alpha$ deficiency)       | 248600         | AR                  | Yes                   |
| <i>BCKDHB</i>  | chr6:80,816,364-81,055,987 forward strand    | Maple syrup urine disease type 1b (due to branched-chain ketoacid dehydrogenase E1 $\beta$ deficiency)        | 248600         | AR                  | No                    |
| <i>BCKDK</i>   | chr16:31,117,428-31,124,110 forward strand   | Autism-epilepsy syndrome (due to branched-chain ketoacid dehydrogenase kinase deficiency)                     | 614923         | AR                  | No                    |

| Gene           | Genomic location (GRCh37)                   | Disorder                                                                                                                                  | OMIM disease #    | Mode of inheritance | Disease in Dutch NBS? |
|----------------|---------------------------------------------|-------------------------------------------------------------------------------------------------------------------------------------------|-------------------|---------------------|-----------------------|
| <i>BTBD</i>    | chr3:15,642,848-15,687,329 forward strand   | Biotinidase deficiency                                                                                                                    | 253260            | AR                  | Yes                   |
| <i>CA5A</i>    | chr16:87,921,625-87,970,135 reverse strand  | Hyperammonemic encephalopathy (due to carbonic anhydrase VA deficiency)                                                                   | 615751            | AR                  | No                    |
| <i>CAD</i>     | chr2:27,440,258-27,466,811 forward strand   | Congenital defect of glycosylation (CDG) type 1z (due to CAD trifunctional protein deficiency)                                            | 616457            | AR                  | No                    |
| <i>CBS</i>     | chr21:44,473,301-44,497,053 reverse strand  | Classic homocystinuria (due to cystathionine $\beta$ -synthase deficiency)                                                                | 236200            | AR                  | No                    |
| <i>CPS1</i>    | chr2:211,342,406-211,543,831 forward strand | Carbamoyl phosphate synthetase 1 deficiency                                                                                               | 237300            | AR                  | No                    |
| <i>CPT1A</i>   | chr11:68,522,088-68,611,878 reverse strand  | Carnitine palmitoyltransferase 1a deficiency                                                                                              | 255120            | AR                  | Yes                   |
| <i>CPT2</i>    | chr1:53,662,101-53,679,869 forward strand   | Carnitine palmitoyltransferase 2 deficiency, infantile;<br>Carnitine palmitoyltransferase 2 deficiency, lethal neonatal                   | 600649;<br>608836 | AR                  | No                    |
| <i>CTNS</i>    | chr17:3,539,762-3,564,836 forward strand    | Cystinosis                                                                                                                                | 219800            | AR                  | No                    |
| <i>CTPS1</i>   | chr1:41,445,007-41,478,235 forward strand   | Severe combined immunodeficiency (due to CTP synthase 1 deficiency)                                                                       | 615897            | AR                  | Yes                   |
| <i>CYP27A1</i> | chr2:219,646,472-219,680,016 forward strand | Cerebrotendinous xanthomatosis (due to sterol 27-hydroxylase deficiency)                                                                  | 213700            | AR                  | No                    |
| <i>DBT</i>     | chr1:100,652,475-100,715,390 reverse strand | Maple syrup urine disease type 2 (due to dihydrolipoyl transacylase deficiency)                                                           | 248600            | AR                  | No                    |
| <i>DNAJC12</i> | chr10:69,556,427-69,597,924 reverse strand  | Hyperphenylalaninemia (due to DNAJC12 deficiency)                                                                                         | 617384            | AR                  | No                    |
| <i>ETFA</i>    | chr15:76,507,696-76,603,813 reverse strand  | Glutaric acidemia type 2a (due to electron transfer flavoprotein $\alpha$ subunit deficiency)                                             | 231680            | AR                  | No                    |
| <i>ETFB</i>    | chr19:51,848,423-51,869,672 reverse strand  | Glutaric acidemia type 2b (due to electron transfer flavoprotein $\beta$ subunit deficiency)                                              | 231680            | AR                  | No                    |
| <i>ETFDH</i>   | chr4:159,593,277-159,630,775 forward strand | Glutaric acidemia type 2c (due to electron transfer flavoprotein dehydrogenase deficiency)                                                | 231680            | AR                  | No                    |
| <i>FAH</i>     | chr15:80,444,832-80,479,288 forward strand  | Tyrosinemia type 1 (due to fumarylacetoacetase deficiency)                                                                                | 276700            | AR                  | Yes                   |
| <i>FBP1</i>    | chr9:97,365,415-97,402,531 reverse strand   | Fructose-1,6-bisphosphatase deficiency                                                                                                    | 229700            | AR                  | No                    |
| <i>FOLR1</i>   | chr11:71,900,602-71,907,345 forward strand  | Neurodegeneration (due to cerebral folate receptor $\alpha$ deficiency)                                                                   | 613068            | AR                  | No                    |
| <i>G6PC</i>    | chr17:41,052,814-41,065,386 forward strand  | Glycogen storage disease type 1a (due to glucose-6-phosphatase deficiency)                                                                | 232200            | AR                  | No                    |
| <i>GALK1</i>   | chr17:73,747,675-73,761,792 reverse strand  | Galactokinase deficiency                                                                                                                  | 230200            | AR                  | Yes                   |
| <i>GALT</i>    | chr9:34,638,130-34,651,032 forward strand   | Classic galactosemia (due to galactose-1-phosphate uridylyltransferase deficiency)                                                        | 230400            | AR                  | Yes                   |
| <i>GAMT</i>    | chr19:1,397,091-1,401,569 reverse strand    | Guanidinoacetate methyltransferase deficiency                                                                                             | 612736            | AR                  | No                    |
| <i>GATM</i>    | chr15:45,653,322-45,694,525 reverse strand  | Cerebral creatine deficiency syndrome 3 (due to arginine:glycine amidinotransferase deficiency)                                           | 612718            | AR                  | No                    |
| <i>GBA</i>     | Chr1:155,204,243-155,214,490 reverse strand | Gaucher disease type III (due to nonlysosomal glucosylceramidase deficiency)                                                              | 231000            | AR                  | No                    |
| <i>GCDH</i>    | chr19:13,001,840-13,025,021 forward strand  | Glutaric acidemia type 1 (due to glutaryl-CoA dehydrogenase deficiency)                                                                   | 231670            | AR                  | Yes                   |
| <i>GCH1</i>    | chr14:55,308,726-55,369,570 reverse strand  | Hyperphenylalaninemia , BH4-deficient, B (due to GTP cyclohydrolase 1 deficiency)                                                         | 233910            | AR                  | No                    |
| <i>GCK</i>     | chr7:44,183,872-44,237,769 reverse strand   | Hyperinsulinemic hypoglycemia (due to glucokinase deficiency);<br>Diabetes mellitus, permanent neonatal 1 (due to glucokinase deficiency) | 602485;<br>606176 | AD;<br>AR           | No                    |

| Gene           | Genomic location (GRCh37)                    | Disorder                                                                                                                   | OMIM disease # | Mode of inheritance | Disease in Dutch NBS? |
|----------------|----------------------------------------------|----------------------------------------------------------------------------------------------------------------------------|----------------|---------------------|-----------------------|
| <i>GLUD1</i>   | chr10:88,810,243-88,854,623 reverse strand   | Hyperinsulinism-hyperammonemia syndrome (due to glutamate dehydrogenase superactivity)                                     | 606762         | AD                  | No                    |
| <i>GPIHBP1</i> | chr8:144,295,068-144,299,044 forward strand  | GPIHBP1 deficiency                                                                                                         | 615947         | AR                  | No                    |
| <i>GYS2</i>    | chr12:21,689,123-21,757,781 reverse strand   | Glycogen storage disease type 0a (due to hepatic glycogen synthase deficiency)                                             | 240600         | AR                  | No                    |
| <i>HADHA</i>   | chr2:26,413,504-26,467,594 reverse strand    | Long-chain 3-hydroxyl-CoA dehydrogenase deficiency (due to trifunctional protein $\alpha$ subunit deficiency)              | 609016         | AR                  | Yes                   |
| <i>HJV</i>     | chr1:145,413,095-145,417,545 forward strand  | Hemochromatosis type 2 (due to hHemojuvelin deficiency)                                                                    | 602390         | AR                  | No                    |
| <i>HLCS</i>    | chr21:38,123,189-38,362,536 reverse strand   | Holocarboxylase synthetase deficiency                                                                                      | 253270         | AR                  | Yes                   |
| <i>HMGCL</i>   | chr1:24,128,375-24,165,110 reverse strand    | 3-hydroxy-3-methylglutaryl-CoA lyase deficiency                                                                            | 246450         | AR                  | Yes                   |
| <i>HMGCS2</i>  | chr1:120,290,619-120,311,528 reverse strand  | Mitochondrial 3-hydroxy-3-methylglutaryl-CoA synthase deficiency                                                           | 605911         | AR                  | No                    |
| <i>HSD3B7</i>  | chr16:30,996,519-31,000,473 forward strand   | Congenital bile acid synthesis defect type 1 (due to 3 $\beta$ -Hydroxy- $\Delta$ 5-C27-steroid oxidoreductase deficiency) | 607765         | AR                  | No                    |
| <i>IDUA</i>    | chr4:980,785-998,316 forward strand          | Hurler syndrome (due to $\alpha$ -iduronidase deficiency)                                                                  | 607015         | AR                  | Yes                   |
| <i>IVD</i>     | chr15:40,697,686-40,728,146 forward strand   | Isovaleric acidemia (due to isovaleryl-CoA dehydrogenase deficiency)                                                       | 243500         | AR                  | Yes                   |
| <i>LPL</i>     | chr8:19,759,228-19,824,769 forward strand    | Lipoprotein lipase deficiency                                                                                              | 238600         | AR                  | No                    |
| <i>MCCC1</i>   | chr3:182,733,006-182,833,863 reverse strand  | 3-methylcrotonylglycinuria type 1 (due to 3-Methylcrotonyl-CoA carboxylase 1 deficiency)                                   | 210200         | AR                  | Yes                   |
| <i>MCCC2</i>   | chr5:70,883,115-70,954,531 forward strand    | 3-methylcrotonylglycinuria type 2 (due to 3-Methylcrotonyl-CoA carboxylase 2 deficiency)                                   | 210210         | AR                  | Yes                   |
| <i>MCEE</i>    | chr2:71,336,814-71,357,369 reverse strand    | Methylmalonic aciduria (due to methylmalonyl-CoA epimerase deficiency)                                                     | 251120         | AR                  | Yes                   |
| <i>MMAA</i>    | chr4:146,539,415-146,581,187 forward strand  | Methylmalonic aciduria, cblA type                                                                                          | 251100         | AR                  | No                    |
| <i>MMACHC</i>  | chr1:45,965,725-45,976,739 forward strand    | Methylmalonic aciduria with homocystinuria, cblC type                                                                      | 277400         | AR                  | No                    |
| <i>MMADHC</i>  | chr21:44,473,301-44,497,053 reverse strand   | Homocystinuria without methylmalonic aciduria, cblD type                                                                   | 277410         | AR                  | No                    |
| <i>MMUT</i>    | chr6:49,398,073-49,430,904 reverse strand    | Methylmalonic aciduria (due to methylmalonyl-CoA mutase deficiency)                                                        | 251000         | AR                  | Yes                   |
| <i>NAGS</i>    | chr17:42,081,914-42,086,431 forward strand   | Hyperammonemia (due to N-acetylglutamate synthase deficiency)                                                              | 237310         | AR                  | No                    |
| <i>OAT</i>     | chr10:126,085,872-126,107,545 reverse strand | Gyrate atrophy of choroid and retina (due to ornithine aminotransferase deficiency)                                        | 258870         | AR                  | No                    |
| <i>OTC</i>     | chrX:38,211,798-38,280,703 forward strand    | Ornithine transcarbamylase deficiency                                                                                      | 311250         | XLR                 | No                    |
| <i>OXCT1</i>   | chr5:41,730,167-41,870,621 reverse strand    | Succinyl-CoA:3-oxoacid-CoA transferase (SCOT) deficiency                                                                   | 245050         | AR                  | No                    |
| <i>PAH</i>     | chr12:103,230,663-103,352,188 reverse strand | Phenylketonuria (due to phenylalanine hydroxylase deficiency)                                                              | 261600         | AR                  | Yes                   |
| <i>PCBD1</i>   | chr10:72,642,037-72,648,541 reverse strand   | Pterin-4- $\alpha$ -carbinolamine dehydratase deficiency                                                                   | 264070         | AR                  | No                    |
| <i>PCCA</i>    | chr13:100,741,269-101,182,686 forward strand | Propionic acidemia (due to propionyl-CoA carboxylase $\alpha$ subunit deficiency)                                          | 606054         | AR                  | Yes                   |
| <i>PCCB</i>    | chr3:135,969,148-136,056,738 forward strand  | Propionic acidemia (due to propionyl-CoA carboxylase $\beta$ subunit deficiency)                                           | 606054         | AR                  | Yes                   |
| <i>PGM1</i>    | chr1:64,058,947-64,125,916 forward strand    | Congenital defect of glycosylation (CDG) type 1t (due to phosphoglucomutase 1                                              | 614921         | AR                  | No                    |

| Gene            | Genomic location (GRCh37)                    | Disorder                                                                                                            | OMIM disease # | Mode of inheritance | Disease in Dutch NBS? |
|-----------------|----------------------------------------------|---------------------------------------------------------------------------------------------------------------------|----------------|---------------------|-----------------------|
|                 |                                              | deficiency)                                                                                                         |                |                     |                       |
| <i>PNP</i>      | chr14:20,937,113-20,945,253 forward strand   | Purine nucleoside phosphorylase deficiency                                                                          | 613179         | AR                  | No                    |
| <i>PTS</i>      | chr11:112,097,088-112,140,678 forward strand | 6-pyruvoyl-tetrahydropterin synthase deficiency                                                                     | 261640         | AR                  | No                    |
| <i>QDPR</i>     | chr4:17,461,884-17,513,857 reverse strand    | Dihydropteridine reductase deficiency                                                                               | 261630         | AR                  | No                    |
| <i>SI</i>       | chr3:164,696,686-164,796,283 reverse strand  | Congenital sucrase-isomaltase deficiency                                                                            | 222900         | AR                  | No                    |
| <i>SLC19A3</i>  | chr2:228,549,926-228,582,728 reverse strand  | Biotin-thiamine-responsive basal ganglia disease (due to thiamine transporter 2 deficiency)                         | 607483         | AR                  | No                    |
| <i>SLC22A5</i>  | chr5:131,705,444-131,731,306 forward strand  | Primary carnitine deficiency                                                                                        | 212140         | AR                  | No                    |
| <i>SLC25A15</i> | chr13:41,363,548-41,384,247 forward strand   | Hyperornithinemia-hyperammonemia-homocitrullinuria syndrome (due to Mitochondrial ornithine transporter deficiency) | 238970         | AR                  | No                    |
| <i>SLC25A20</i> | chr3:48,894,369-48,936,426 reverse strand    | Carnitine-acylcarnitine translocase deficiency                                                                      | 212138         | AR                  | No                    |
| <i>SLC2A1</i>   | chr1:43,391,052-43,424,530 reverse strand    | GLUT1 deficiency                                                                                                    | 606777         | AD                  | No                    |
| <i>SLC2A2</i>   | chr3:170,714,137-170,744,539 reverse strand  | Fanconi-Bickel syndrome (due to glucose transporter 2 deficiency)                                                   | 227810         | AR                  | No                    |
| <i>SLC37A4</i>  | chr11:118,894,824-118,901,616 reverse strand | Glycogen storage disease type 1b (due to glucose-6-phosphate transporter deficiency)                                | 232220         | AR                  | No                    |
| <i>SLC40A1</i>  | chr2:190,425,305-190,448,484 reverse strand  | Hereditary hemochromatosis type 4 (due to ferroportin deficiency)                                                   | 606069         | AD                  | No                    |
| <i>SLC46A1</i>  | Chr17:26,721,661-26,734,215 reverse strand   | Hereditary folate malabsorption (due to proton-coupled folate transporter deficiency)                               | 229050         | AR                  | No                    |
| <i>SLC52A2</i>  | chr8:145,577,795-145,584,932 forward strand  | Brown-Vialetto van Laere syndrome type 2 (due to riboflavin transporter 3 deficiency)                               | 614707         | AR                  | No                    |
| <i>SLC52A3</i>  | chr20:740,724-749,131 reverse strand         | Brown-Vialetto van Laere syndrome type 1 (due to riboflavin transporter 2 deficiency)                               | 211530         | AR                  | No                    |
| <i>SLC5A1</i>   | chr22:32,439,019-32,509,016 forward strand   | Glucose-galactose malabsorption (due to intestinal sodium-glucose cotransporter 1 deficiency)                       | 606824         | AR                  | No                    |
| <i>TAT</i>      | chr16:71,599,563-71,611,033 reverse strand   | Tyrosinemia type 2 (due to tyrosine aminotransferase deficiency)                                                    | 276600         | AR                  | No                    |
| <i>TCN2</i>     | chr22:31,002,825-31,023,265 forward strand   | Transcobalamin 2 deficiency                                                                                         | 275350         | AR                  | No                    |
| <i>TH</i>       | chr11:2,185,159-2,193,107 reverse strand     | Segawa syndrome (due to tyrosine hydroxylase deficiency)                                                            | 605407         | AR                  | No                    |
| <i>TPK1</i>     | chr7:144,149,034-144,533,488 reverse strand  | Episodic encephalopathy (due to thiamine pyrophosphokinase deficiency)                                              | 614458         | AR                  | No                    |
| <i>TTPA</i>     | chr8:63,961,112-63,998,612 reverse strand    | Ataxia with isolated vitamin E deficiency (due to $\alpha$ -tocopherol transfer protein deficiency)                 | 277460         | AR                  | No                    |



**Table S2: Identified homozygous pathogenic variants in three individuals in the background population that would be reported in a NBS setting.**

| ID    | Variant                                                                                 | Comment                                                                                                                                        |
|-------|-----------------------------------------------------------------------------------------|------------------------------------------------------------------------------------------------------------------------------------------------|
| S2209 | <i>ACADVL</i> Chr17(GRCh37) :g.7125591T>C<br>NM_000018.4 :c.848T>C p.(Val283Ala) ; hom. | VLCAD deficiency; variant associated with mild phenotype, (late onset, one or few episodes of metabolic decompensation) [7].                   |
| S4220 | <i>CPT1A</i> Chr11(GRCh37):g.68548130G>A<br>NM_001876.4:c.1436C>T p.(Pro479Leu); hom.   | CPT I deficiency; variant associated with variable phenotype (healthy to severe) [8].                                                          |
| S2906 | <i>MCCC2</i> Chr5(GRCh37):g.70945016A>G<br>NM_022132.5:c.1309A>G p.(Ile437fs); hom.     | 3-methylcrotonyl-CoA carboxylase 2 deficiency; variant associated with variable phenotype with asymptomatic homozygous siblings described [9]. |

**Table S3: Identified combinations of a (L)P variant and VUS in four individuals in the background cohort that might need to be reported in a NBS setting.**

| ID    | Variant                                                                                        | Comment                                                                                                     |
|-------|------------------------------------------------------------------------------------------------|-------------------------------------------------------------------------------------------------------------|
| S4422 | <i>AGL</i> Chr1(GRCh37):g.100361878del NM_000642.3:c.3299del p.(Gly1100fs); het.               | Pathogenic: frameshift resulting in NMD                                                                     |
|       | <i>AGL</i> Chr1(GRCh37):g.100377978A>C NM_000642.3:c.3854A>C p.(Glu1285Ala); het.              | VUS: 3/4 deleterious <i>in silico</i> predictions                                                           |
| S4007 | <i>CBS</i> Chr21(GRCh37):g.44479080T>G NM_000071.3:c.1224-2A>C p.Trp408_Gly453del; het.        | Pathogenic: in-frame deletion of exon 12[10]; no activity detected[11].                                     |
|       | <i>CBS</i> Chr21(GRCh37):g.44480591G>A NM_000071.3:c.1105C>T p.(Arg369Cys); het.               | VUS: Yeast similar to WT[12]; 34% and 54% activity in <i>E. coli</i> and CHO-K1[13].                        |
| S255  | <i>GBA</i> Chr1(GRCh37):g.155205043A>G NM_000157.4:c.1448T>C p.(Leu483Pro); het.               | Pathogenic: most common variant in Gaucher's disease; reduced half-life, because protein gets degraded[14]. |
|       | <i>GBA</i> Chr1(GRCh37):g.155206036C>T NM_000157.4:c.1224G>A p.(Thr408=); het.                 | VUS: Splicing defect predicted in Alamut; in-frame PD; not in SpliceAI; found in Parkinson's disease[15].   |
| S4762 | <i>SI</i> Chr3(GRCh37):g.164741534A>G NM_001041.4:c.2923T>C p.(Tyr975His); het.                | VUS: described in a low sucrase patient[16].                                                                |
|       | <i>SI</i> Chr3(GRCh37):g.164735598_164735599del NM_001041.4:c.3586_3587del p.(Met1196fs); het. | Likely pathogenic: frameshift resulting in NMD; Classified as LP by ACMG guideline in literature[17].       |

**Table S4. List of heterozygous (likely) pathogenic variants in autosomal recessive genes, indicating carriership, detected with one or more NGS techniques.**

| Sample ID             | Heterozygous variant                                                                       | Detected with |
|-----------------------|--------------------------------------------------------------------------------------------|---------------|
| 2                     | <i>BTBD</i> Chr3(GRCh37):g.15686731A>C NM_001370658.1:c.1308A>C p.(Gln436His)              | tNGS/WES/WGS  |
| 11/27/41              | <i>LPL</i> Chr8(GRCh37):g.19811685C>G NM_000237.3:c.596C>G p.(Ser199Cys)                   | tNGS          |
| 17                    | <i>ARSA</i> Chr22(GRCh37):g.51063820G>A NM_000487.6:c.1283C>T p.(Pro428Leu)                | tNGS/WES/WGS  |
| 18                    | <i>SI</i> Chr3(GRCh37):g.164739053C>T NM_001041.4:c.3218G>A p.(Gly1073Asp)                 | tNGS          |
| 32                    | <i>MCCC1</i> Chr3(GRCh37):g.182759428_182759429del NM_020166.4:c.1193_1194del p.(Val398fs) | WES/WGS       |
| 42                    | <i>MCCC2</i> Chr5(GRCh37):g.70936845G>A NM_022132.5:c.1015G>A p.(Val339Met)                | tNGS          |
| 43                    | <i>SI</i> Chr3(GRCh37):g.164764786A>C NM_001041.4:c.1730T>G p.(Val577Gly)                  | tNGS          |
| 45                    | <i>TTPA</i> Chr8(GRCh37):g.63978594C>T NM_000370.3:c.421G>A p.(Glu141Lys)                  | WES/WGS       |
| 46                    | <i>TH</i> Chr11(GRCh37):g.2189135C>T NM_199292.1:c.698G>A p.(Arg233His)                    | tNGS          |
| Negative control      | <i>PCCB</i> Chr3(GRCh37):g.136035907G>A NM_001178014.1:c.1150+1G>A r.spl p.?               | WES           |
| Negative control      | <i>MCEE</i> Chr2(GRCh37):g.71351575G>A NM_032601.4:c.139C>T p.(Arg47*)                     | tNGS/WES      |
| Negative control      | <i>ACADM</i> Chr1(GRCh37):g.76226933A>G NM_001286042.1:c.964A>G p.(Lys211Glu)              | WES           |
| Negative control      | <i>ATP7B</i> Chr13(GRCh37):g.52524268C>T NM_000053.4(ATP7B):c.2605G>A p.(Gly869Arg)        | tNGS/WES      |
| Negative control      | <i>PAH</i> Chr12(GRCh37):g.103246714G>A NM_000277.1:c.721C>T p.(Arg241Cys)                 | WES           |
| Negative control      | <i>GALT</i> Chr9(GRCh37):g.34648167A>G NM_000155.3:c.563A>G p.(Gln188Arg)                  | tNGS          |
| Negative control      | <i>PCCB</i> Chr3(GRCh37):g.135969390A>C NM_001178014.1:c.173A>C p.(Gln58Pro)               | tNGS/WES      |
| Negative control (2x) | <i>ALDOB</i> Chr9(GRCh37):g.104189856C>G NM_000035.3:c.448G>C p.(Ala150Pro)                | tNGS/WES      |
| Negative control (2x) | <i>APOC2</i> Chr19(GRCh37):g.45452024A>C NM_000483.5:c.122A>C p.(Lys41Thr)                 | tNGS          |
| Negative control      | <i>ACADM</i> Chr1(GRCh37):g.76226846A>G NM_000016.5:c.985A>G p.(Lys329Glu)                 | tNGS          |
| Negative control      | <i>PAH</i> Chr12(GRCh37):g.103246708G>A NM_000277.2:c.727C>T p.(Arg243*)                   | tNGS          |
| Negative control (2x) | <i>SLC22A5</i> Chr5(GRCh37):g.131705516G>A NM_003060.3:c.-149G>A p.?                       | tNGS          |
| Negative control      | <i>ACADVL</i> Chr17(GRCh37):g.7125591T>C NM_000018.3:c.848T>C p.(Val283Ala)                | tNGS          |
| Negative control      | <i>CBS</i> Chr21(GRCh37):g.44483184A>G NM_000071.2:c.833T>C p.(Ile278Thr)                  | tNGS          |

## References Supplementary files

1. Li, H.; Durbin, R. Fast and Accurate Long-Read Alignment with Burrows–Wheeler Transform. *Bioinformatics* **2010**, *26*, 589–595.
2. Altshuler, D.L.; Durbin, R.M.; Abecasis, G.R.; Bentley, D.R.; Chakravarti, A.; Clark, A.G.; Collins, F.S.; de La Vega, F.M.; Donnelly, P.; Egholm, M.; et al. A Map of Human Genome Variation from Population Scale Sequencing. *Nature* **2010**, *467*, 1061, doi:10.1038/NATURE09534.
3. McKenna, A.; Hanna, M.; Banks, E.; Sivachenko, A.; Cibulskis, K.; Kernytsky, A.; Garimella, K.; Altshuler, D.; Gabriel, S.; Daly, M.; et al. The Genome Analysis Toolkit: A MapReduce Framework for Analyzing next-Generation DNA Sequencing Data. *Genome Res* **2010**, *20*, 1297–1303, doi:10.1101/GR.107524.110.
4. Johansson, L.F.; van Dijk, F.; de Boer, E.N.; van Dijk-Bos, K.K.; Jongbloed, J.D.H.; van der Hout, A.H.; Westers, H.; Sinke, R.J.; Swertz, M.A.; Sijmons, R.H.; et al. CoNVaDING: Single Exon Variation Detection in Targeted NGS Data. *Hum Mutat* **2016**, *37*, 457–464, doi:10.1002/HUMU.22969.
5. Deden, C.; Neveling, K.; Zafeiropopoulou, D.; Gilissen, C.; Pfundt, R.; Rinne, T.; de Leeuw, N.; Faas, B.; Gardeitchik, T.; Sallevelt, S.C.E.H.; et al. Rapid Whole Exome Sequencing in Pregnancies to Identify the Underlying Genetic Cause in Fetuses with Congenital Anomalies Detected by Ultrasound Imaging. *Prenat Diagn* **2020**, *40*, 972–983, doi:10.1002/PD.5717.
6. Lelieveld, S.H.; Reijnders, M.R.F.; Pfundt, R.; Yntema, H.G.; Kamsteeg, E.J.; De Vries, P.; De Vries, B.B.A.; Willemsen, M.H.; Kleefstra, T.; Löhner, K.; et al. Meta-Analysis of 2,104 Trios Provides Support for 10 New Genes for Intellectual Disability. *Nat Neurosci* **2016**, *19*, 1194–1196, doi:10.1038/NN.4352.
7. Spiekerkoetter, U.; Sun, B.; Zytkevich, T.; Wanders, R.; Strauss, A.W.; Wendel, U. MS/MS-Based Newborn and Family Screening Detects Asymptomatic Patients with Very-Long-Chain Acyl-CoA Dehydrogenase Deficiency. *Journal of Pediatrics* **2003**, *143*, 335–342, doi:10.1067/S0022-3476(03)00292-0.
8. Greenberg, C.R.; Dilling, L.A.; Thompson, G.R.; Seargeant, L.E.; Haworth, J.C.; Phillips, S.; Chan, A.; Vallance, H.D.; Waters, P.J.; Sinclair, G.; et al. The Paradox of the Carnitine Palmitoyltransferase Type Ia P479L Variant in Canadian Aboriginal Populations. *Mol Genet Metab* **2009**, *96*, 201–207, doi:10.1016/J.YMGME.2008.12.018.
9. Mourmans, J.; Bakkeren, J.; de Jong, J.; Wevers, R.; van Diggelen, O.P.; Suormala, T.; Baumgartner, R.; Wendel, U. Isolated (Biotin-Resistant) 3-Methylcrotonyl-CoA Carboxylase Deficiency: Four Sibs Devoid of Pathology. *J Inherit Metab Dis* **1995**, *18*, 643–645, doi:10.1007/BF02436014.

10. Kozich, V.; Kraus, J.P. Screening for Mutations by Expression Patient CDNA Segments in E. Coli: Homocystinuria Due to Cystathionine Beta-Synthase Deficiency. *Hum Mutat* **1992**, *1*, 113–123.
11. Kopecká, J.; Krijt, J.; Raková, K.; Kožich, V. Restoring Assembly and Activity of Cystathionine  $\beta$ -Synthase Mutants by Ligands and Chemical Chaperones. *J Inherit Metab Dis* **2011**, *34*, 39–48, doi:10.1007/s10545-010-9087-5.
12. Mayfield, J.A.; Davies, M.W.; Dimster-Denk, D.; Pleskac, N.; McCarthy, S.; Boydston, E.A.; Fink, L.; Lin, X.X.; Narain, A.S.; Meighan, M.; et al. Surrogate Genetics and Metabolic Profiling for Characterization of Human Disease Alleles. *Genetics* **2012**, *190*, 1309–1323, doi:10.1534/genetics.111.137471.
13. Janošík, M.; Sokolová, J.; Janošíková, B.; Krijt, J.; Klatovská, V.; Kožich, V. Birth Prevalence of Homocystinuria in Central Europe: Frequency and Pathogenicity of Mutation c.1105C>T (p.R369C) in the Cystathionine Beta-Synthase Gene. *Journal of Pediatrics* **2009**, *154*, 431–437, doi:10.1016/j.jpeds.2008.09.015.
14. Lu, J.; Yang, C.; Chen, M.; Ye, D.Y.; Lonser, R.R.; Brady, R.O.; Zhuang, Z. Histone Deacetylase Inhibitors Prevent the Degradation and Restore the Activity of Glucocerebrosidase in Gaucher Disease. *Proc Natl Acad Sci U S A* **2011**, *108*, 21200–21205, doi:10.1073/pnas.1119181109.
15. den Heijer, J.M.; Cullen, V.C.; Quadri, M.; Schmitz, A.; Hilt, D.C.; Lansbury, P.; Berendse, H.W.; van de Berg, W.D.J.; de Bie, R.M.A.; Boertien, J.M.; et al. A Large-Scale Full GBA1 Gene Screening in Parkinson's Disease in the Netherlands. *Movement Disorders* **2020**, *35*, 1667–1674, doi:10.1002/mds.28112.
16. Deb, C.; Campion, S.; Derrick, V.; Ruiz, V.; Abomoelak, B.; Avdella, A.; Zou, B.; Horvath, K.; Mehta, D.I. Sucrase-Isomaltase Gene Variants in Patients with Abnormal Sucrase Activity and Functional Gastrointestinal Disorders. *J Pediatr Gastroenterol Nutr* **2021**, *72*, 29–35, doi:10.1097/MPG.0000000000002852.
17. Capalbo, A.; Valero, R.A.; Jimenez-Almazan, J.; Pardo, P.M.; Fabiani, M.; Jiménez, D.; Simon, C.; Rodriguez, J.M. Optimizing Clinical Exome Design and Parallel Gene-Testing for Recessive Genetic Conditions in Preconception Carrier Screening: Translational Research Genomic Data from 14,125 Exomes. *PLoS Genet* **2019**, *15*, doi:10.1371/journal.pgen.1008409.
